# Supplementary material for: National surveillance for type 1, type 2 diabetes and prediabetes among children and adolescents: a population-based study (SAUDI-DM)
Source: PubMed Central journal article supplement — J Epidemiol Community Health. 2015 Jun 17;69(11):1045–51. doi: 10.1136/jech-2015-205710 (PMC4680138; doi:10.1136/jech-2015-205710), 2015-06-17
Supplement: jech-2015-205710-s1.pdf [file jech-2015-205710-s1.pdf]

Supplementary Table 1: The prevalence of known type 1, type 2, and new diabetes and IFG cases in children and adolescent between SAUDI-DM and other comparative international epidemiological studies classified by age groups.

| Study name    | Known diabetic patients (%) |                     |                     |                       |                      |                      | New diabetic patients (%) |                     |                       |                       |
|---------------|-----------------------------|---------------------|---------------------|-----------------------|----------------------|----------------------|---------------------------|---------------------|-----------------------|-----------------------|
|               | Age group 0-18 years        |                     |                     | Age group 12-18 years |                      |                      | Age group 6-18 years      |                     | Age group 12-18 years |                       |
|               | Type 1 diabetes             | Type 2 diabetes     | Total               | Type 1 diabetes       | Type 2 diabetes      | Total                | New diabetic cases        | IFG                 | New diabetic cases    | IFG                   |
| SAUDI-DM      | 0.37                        | 0.07                | 0.45                | 0.46                  | 0.11                 | 0.57                 | 4.29                      | 6.15                | 4.57                  | 6.62                  |
| Other studies | 0.19 <sup>(6)</sup>         | 0.04 <sup>(6)</sup> | 0.23 <sup>(6)</sup> | 0.48 <sup>(15)</sup>  | 0.24 <sup>(15)</sup> | 0.72 <sup>(15)</sup> | 1.0 <sup>(16)</sup>       | 6.5 <sup>(16)</sup> | 3.5 <sup>(5)</sup>    | 13.10 <sup>(17)</sup> |

IFG, impaired fasting glucose; SAUDI-DM, Saudi Abnormal Glucose Metabolism and Diabetes Impact Study
